# Supplementary material for: Transcriptomic changes due to water deficit define a general soybean response and accession-specific pathways for drought avoidance
Source: PubMed Central journal article supplement (PMC4322458; doi:10.1186/s12870-015-0422-8), 2015-02-03

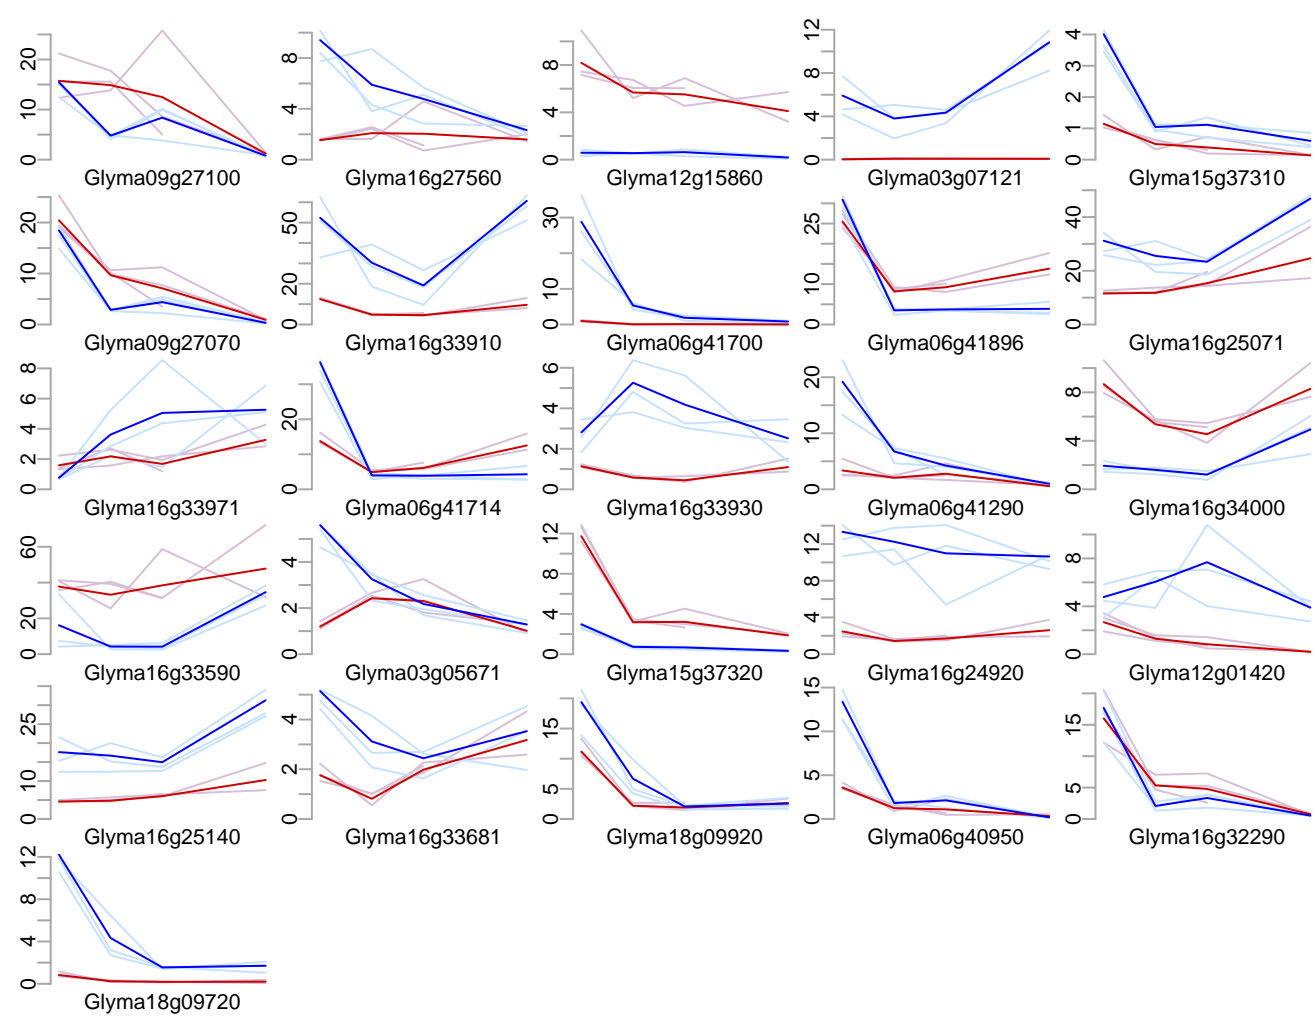

Supplement: 12870_2015_422_MOESM6_ESM.pdf [file 12870_2015_422_MOESM6_ESM.pdf]
